# Supplementary material
Source: MDPI journal article supplement (https://www.mdpi.com/2073-4344/11/5/589)
Supplement: s1 [file s1 › catalysts-1189876-supplementary.pdf]

# SnS<sub>2</sub>/TiO<sub>2</sub> Nanocomposites for Hydrogen Production and Photodegradation under Extended Solar Irradiation

## Supporting information

Table S1: Theoretical and experimental value of ratio between Sn and Ti from EDS analysis.

| Material | Atomic ratio ( Theoretical value) |         |              | Atomic ratio (Experimental value) |      |              |
|----------|-----------------------------------|---------|--------------|-----------------------------------|------|--------------|
|          | Number of atoms                   |         | Atomic ratio | Number of atoms                   |      | Atomic ratio |
|          | Sn                                | Ti      |              | Sn                                | Ti   |              |
| ST-5     | 1.647065                          | 75.4013 | 0.021844     | 1                                 | 33.4 | 0.029940     |
| ST-10    | 3.294131                          | 75.4013 | 0.043688     | 1.2                               | 30.7 | 0.039088     |
| ST-15    | 4.941196                          | 75.4013 | 0.065532     | 1.5                               | 29.1 | 0.051546     |
| ST-20    | 6.588261                          | 75.4013 | 0.087376     | 2.2                               | 21.7 | 0.101382     |

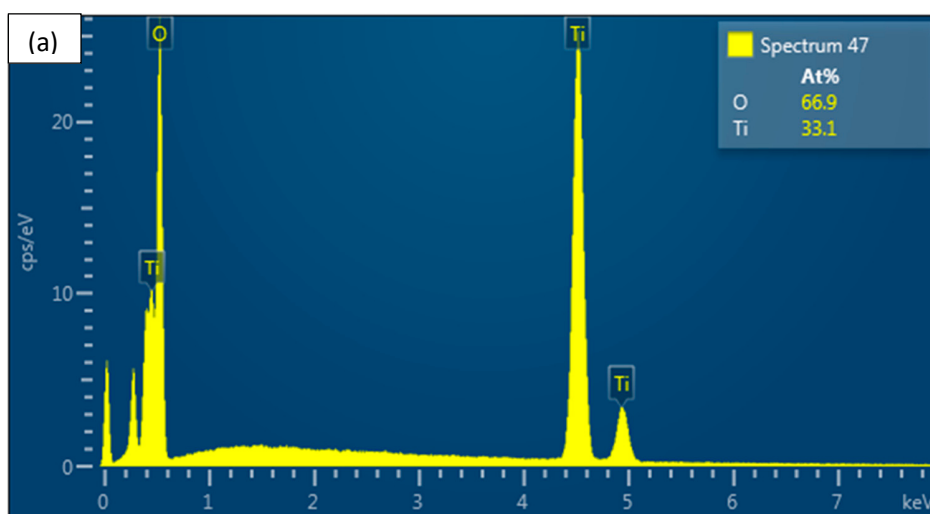

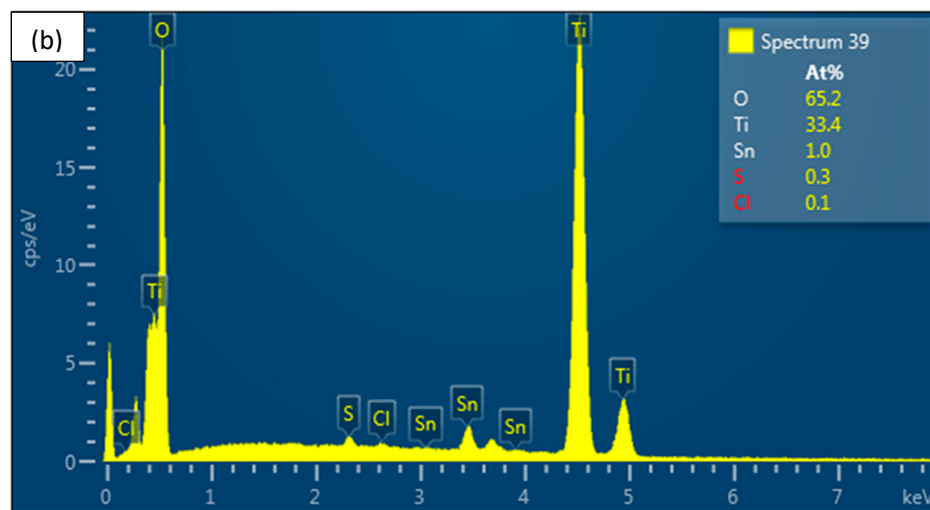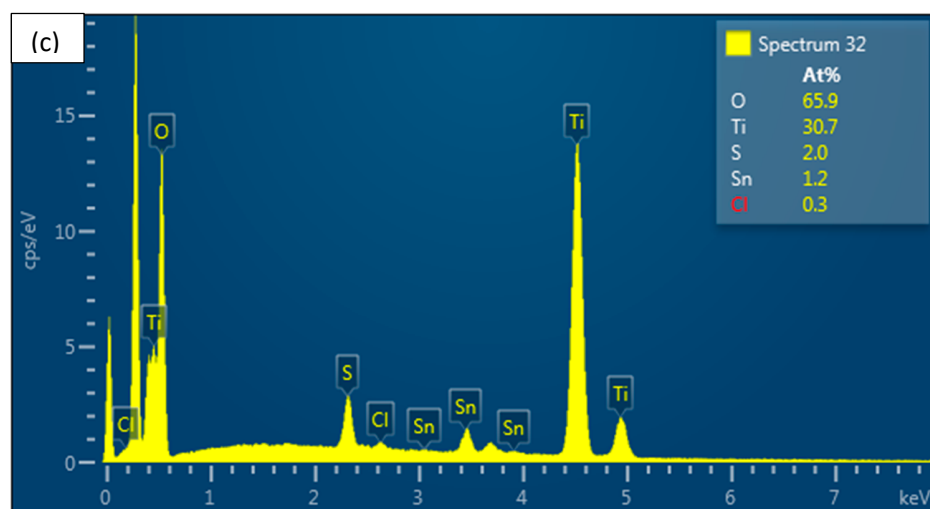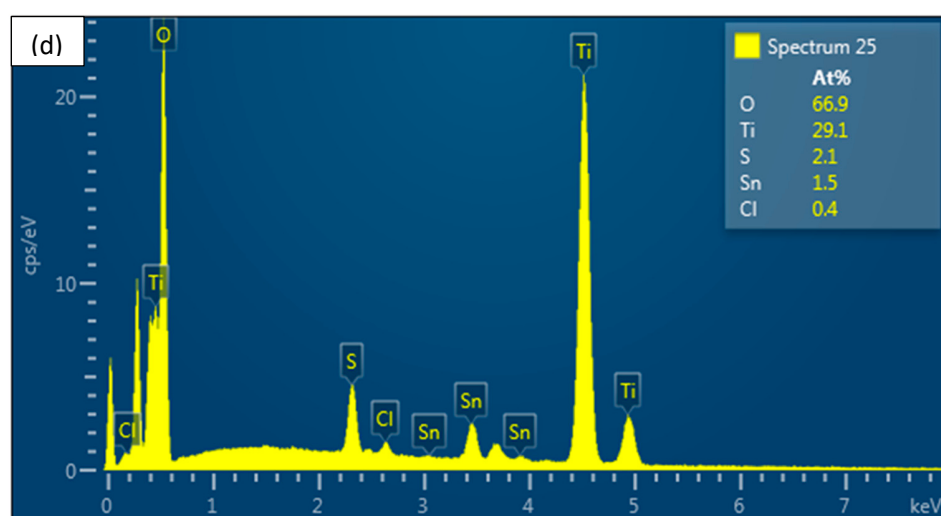

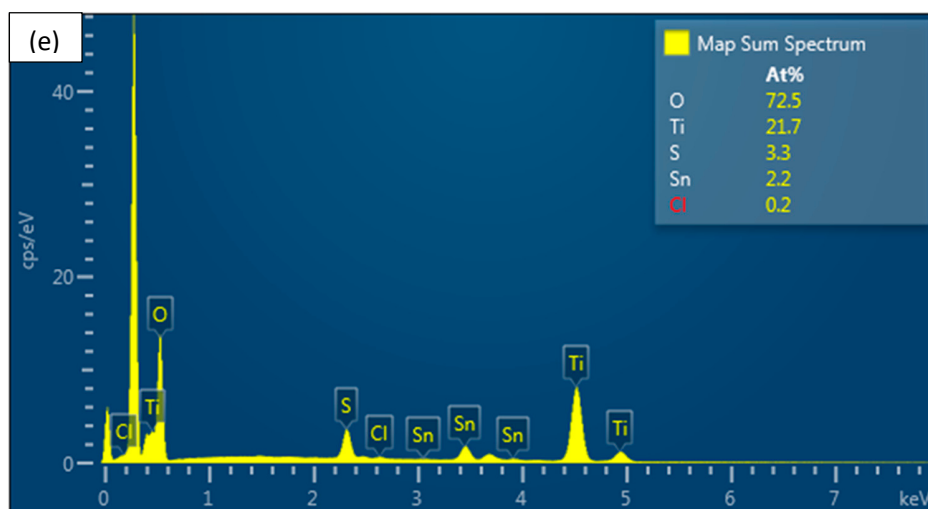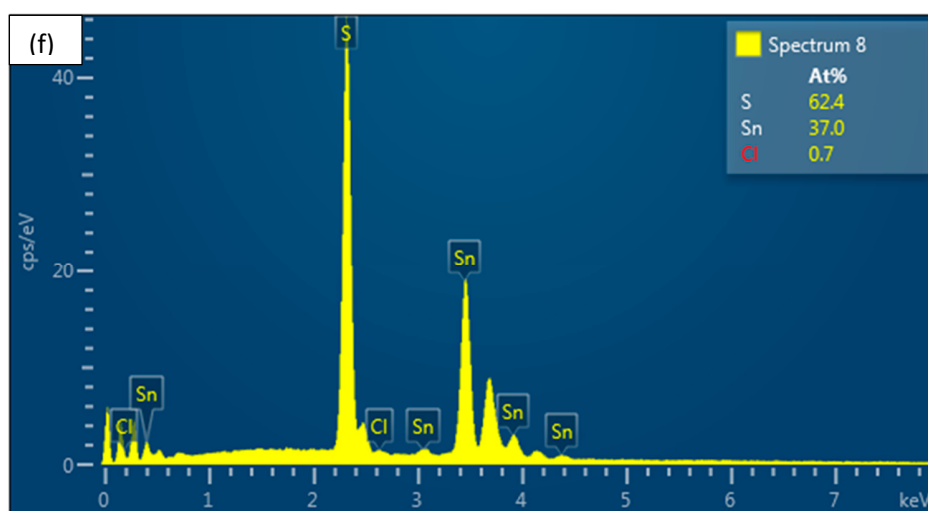

Figure S1: Elemental dispersive spectra for ST-0, ST-5, ST-10, ST-15, ST-20 and ST-100.

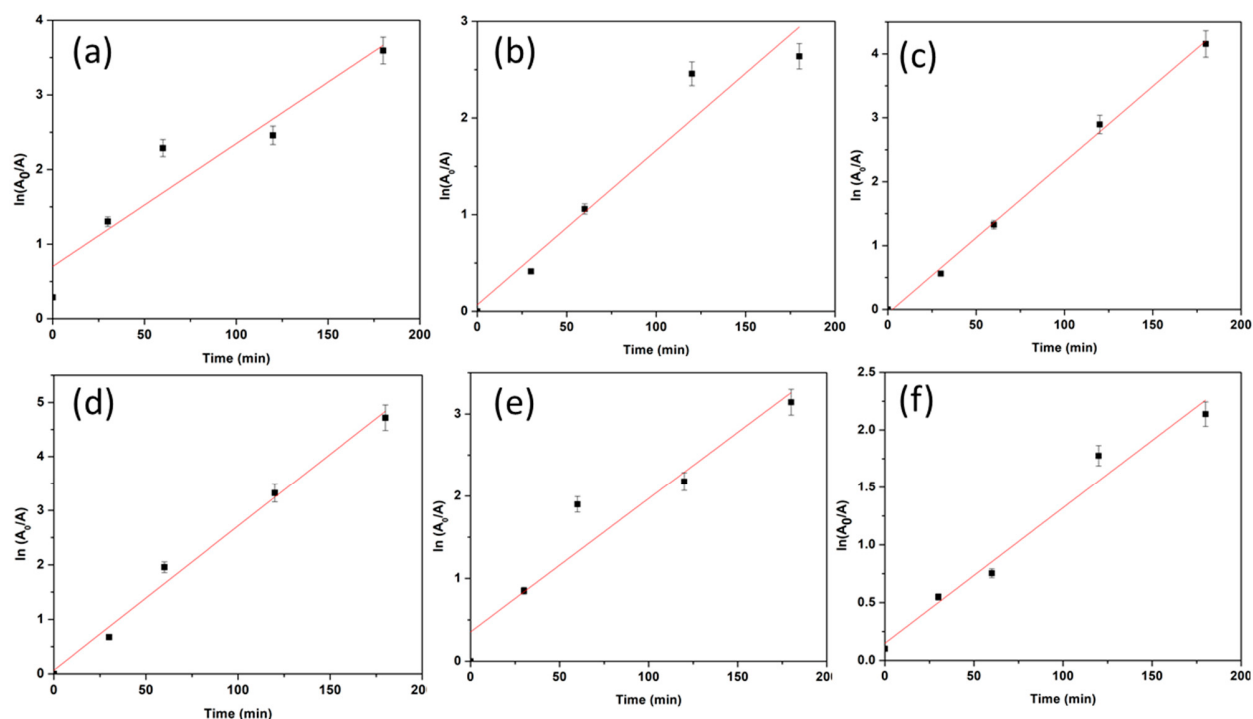

Figure S2: First order kinetics of degradation of methylene blue by using samples ST-0, ST-5, ST-10, ST-15, ST-20 and ST-100

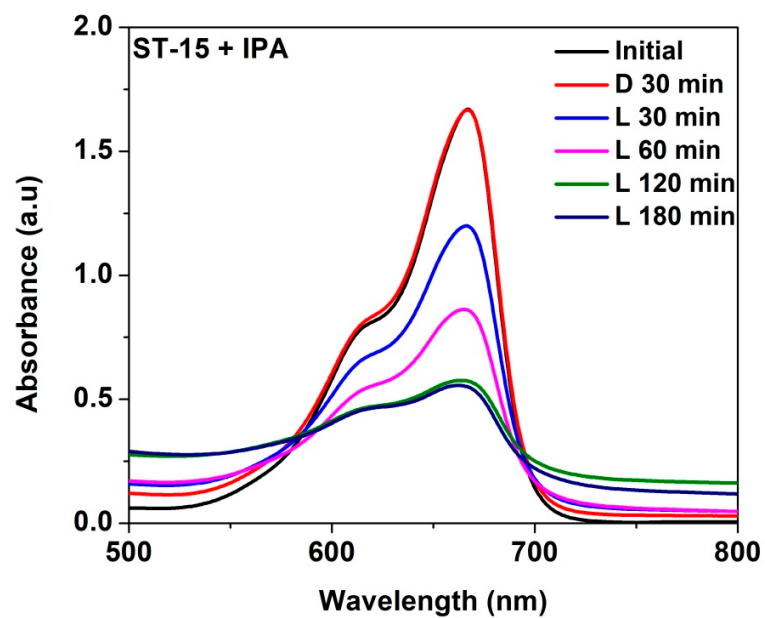

Figure S3: Absorbance *vs.* Wavelength graph for photodegradation of MB by using catalyst with IPA solution.

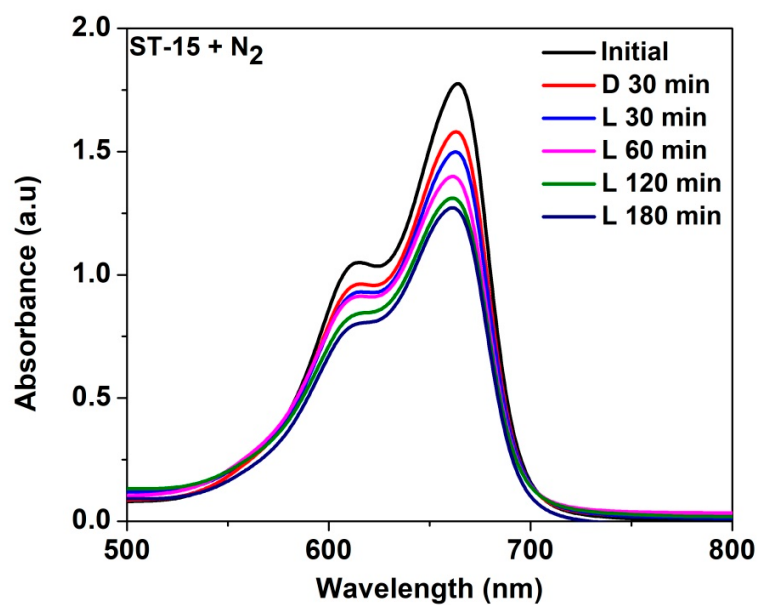

Figure S4: Absorbance *vs.* Wavelength graph for photodegradation of MB by using catalyst in the presence of N<sub>2</sub> gas.

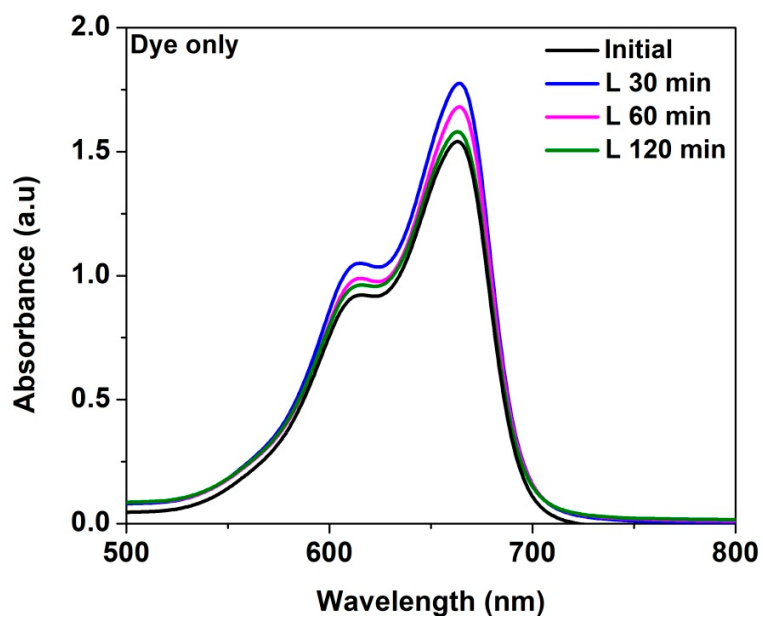

Figure S5: Absorbance *vs.* Wavelength graph for photodegradation of MB under exposure of light without catalyst.

Table S2: Rate constants for the degradation of MB with scavenging agents over simulated irradiation.

| Sample                 | R <sup>2</sup> value | Rate constant (1 <sup>st</sup> order) of photo degradation reaction ( $\times 10^{-4} \text{ s}^{-1}$ ) |
|------------------------|----------------------|---------------------------------------------------------------------------------------------------------|
| ST-15                  | 0.9759               | $4.526 \pm 0.408$                                                                                       |
| ST-15 + IPA            | 0.9574               | $0.990 \pm 0.208$                                                                                       |
| ST-15 + N <sub>2</sub> | 0.9029               | $0.206 \pm 0.033$                                                                                       |
